# Supplementary material for: Mechanical modulation of 2D transition metal dichalcogenide alloys
Source: Royal Society of Chemistry journal article supplement (doi:10.1039/d4nr04160g), 2025-01-01
Supplement: d4nr04160g1.pdf [file d4nr04160g1.pdf]

## Supporting Information

### *Mechanical modulation of 2D transition metal dichalcogenide alloys*

*Guy Alboteanu, Dan Mordehai, and Assaf Ya'akovovitz*

#### **Young's moduli and pretension measurements**

Additional Young's moduli and pretension measurements as a function of the atomic composition,  $x$ , are shown in Figures S1 and S2, respectively. In Figure S3 we present the Young's moduli and pretension of WS<sub>2</sub> and MoS<sub>2</sub>.

#### **Additional Raman and photoluminescence measurements**

Raman measurements of 19 nm thick nano-drumheads having different W concentrations are shown in Figure S4. PL measurements of 19 nm and 28 nm thick nano-rumheads are shown in Figure S5.

#### **Additional atomistic simulation results**

More information obtained from the atomistic simulations is shown in Figures S6 and S7.

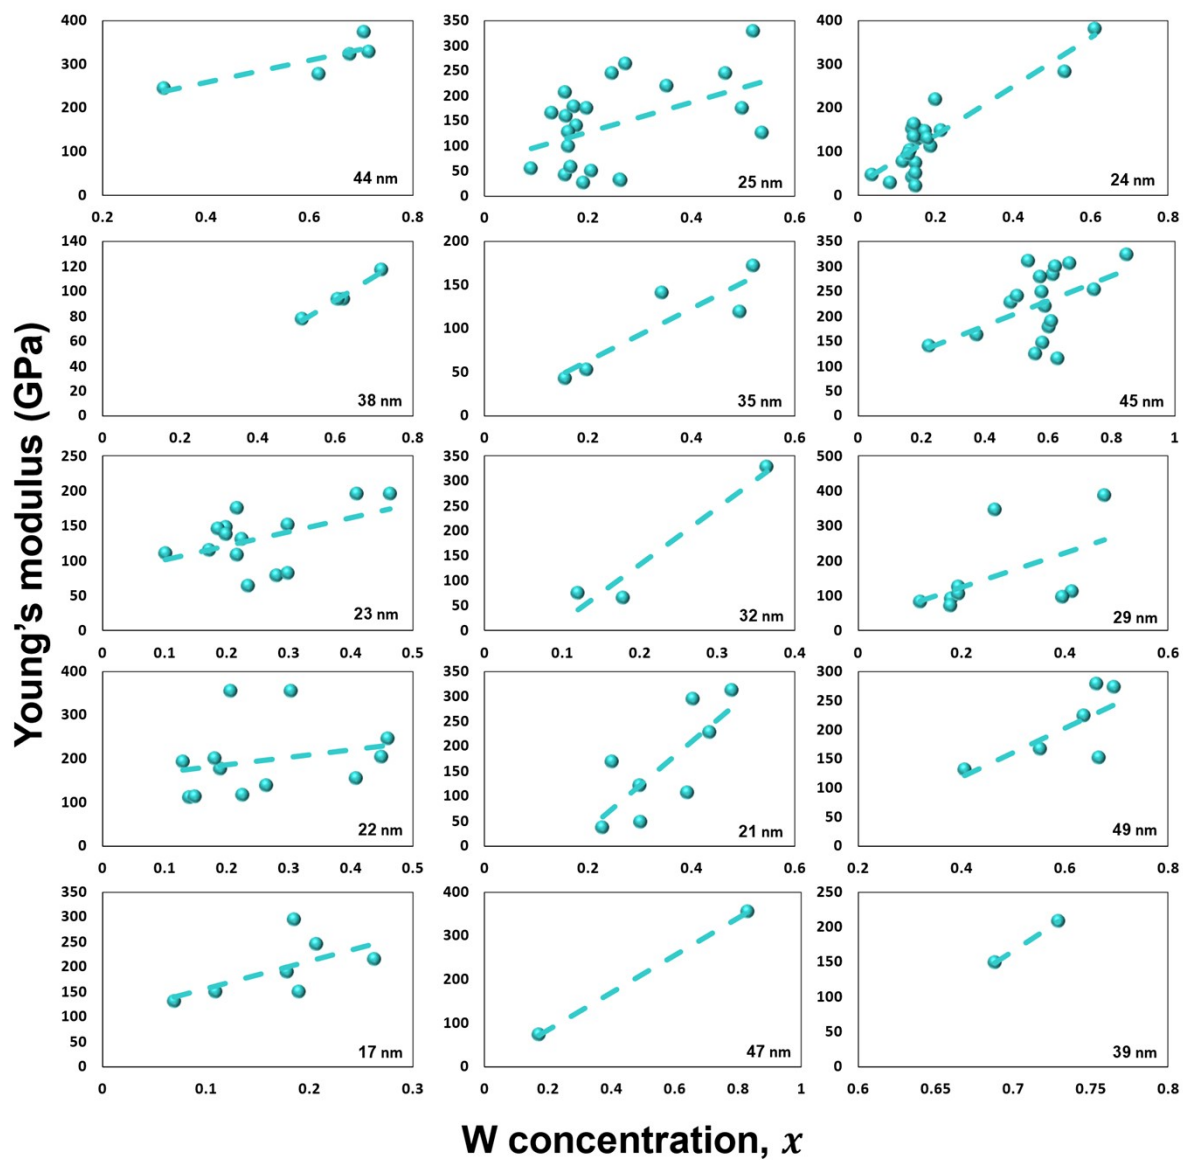

Fig. S1. Young's moduli of nano-drumheads of different thicknesses (noted on the graphs) as a function of W concentration,  $x$ . Trendlines are shown as dashed lines.

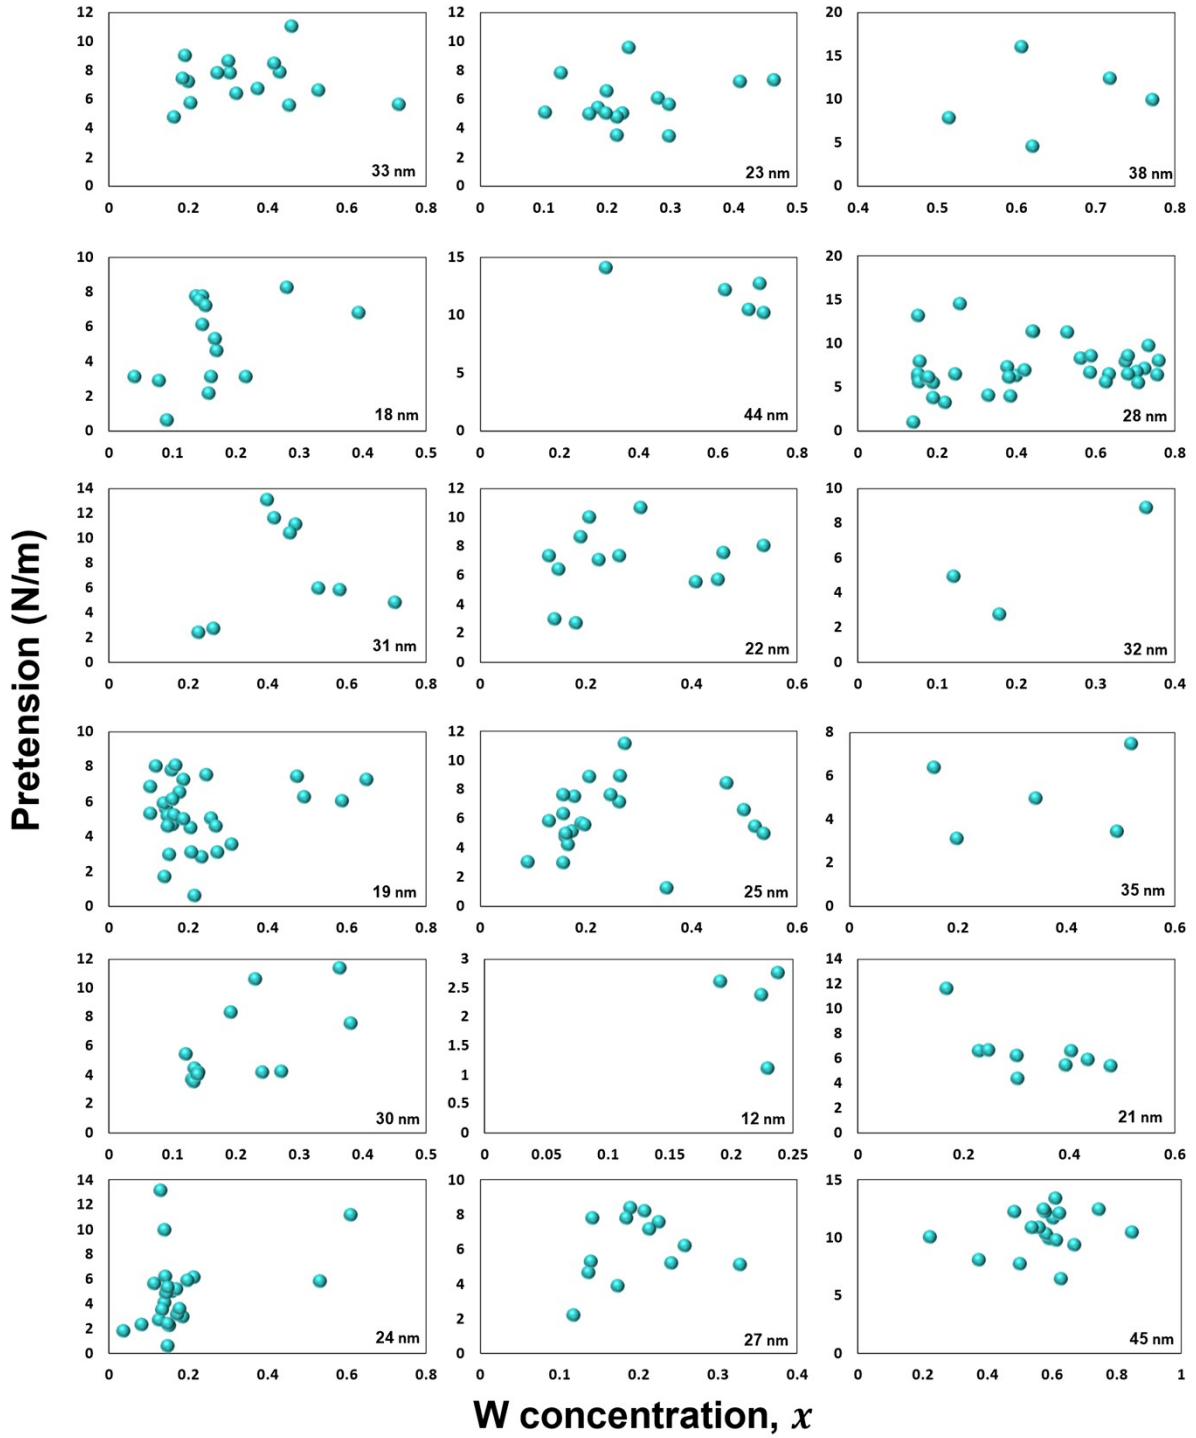

Fig. S2. Pretension of nano-drumheads of different thicknesses (noted on the graphs) as a function of W concentration,  $x$ .

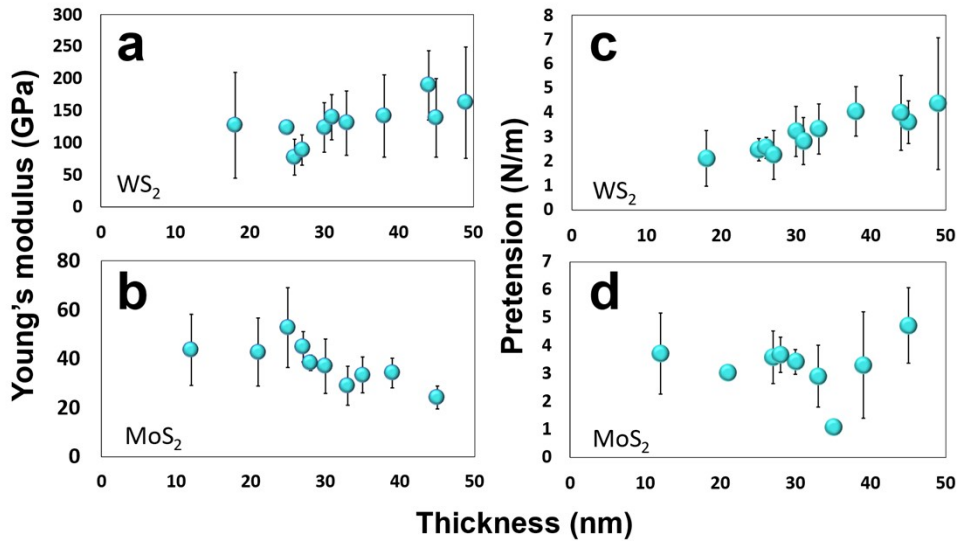

Fig. S3. Young's moduli and pretension of WS<sub>2</sub> and MoS<sub>2</sub> nano-drumheads as a function of the thicknesses.

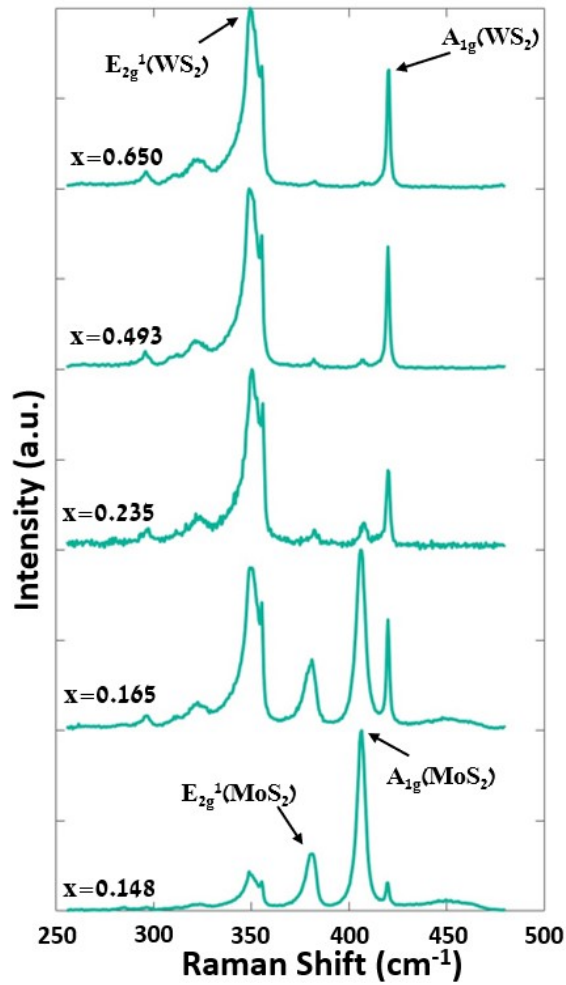

Fig. S4. Raman measurements of 19 nm thick nano-drumheads of different W compositions.

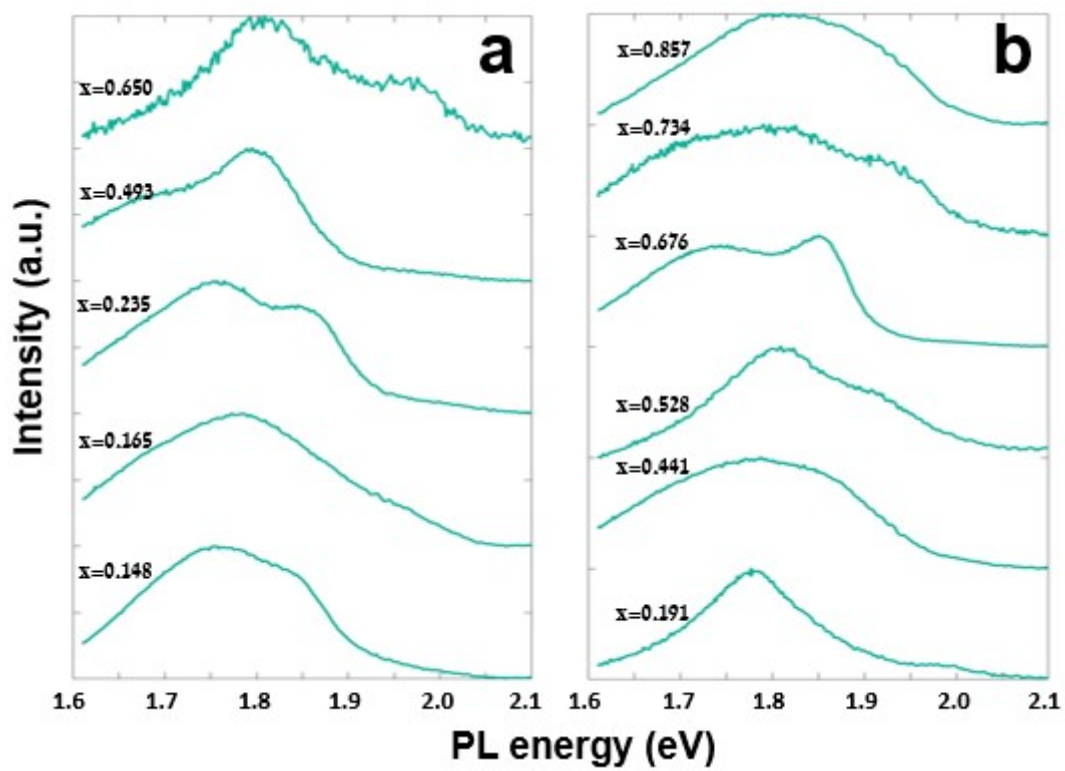

Fig. S5. PL measurements of (a) 19 nm and (b) 28 nm thick nano-drumheads of different W compositions.

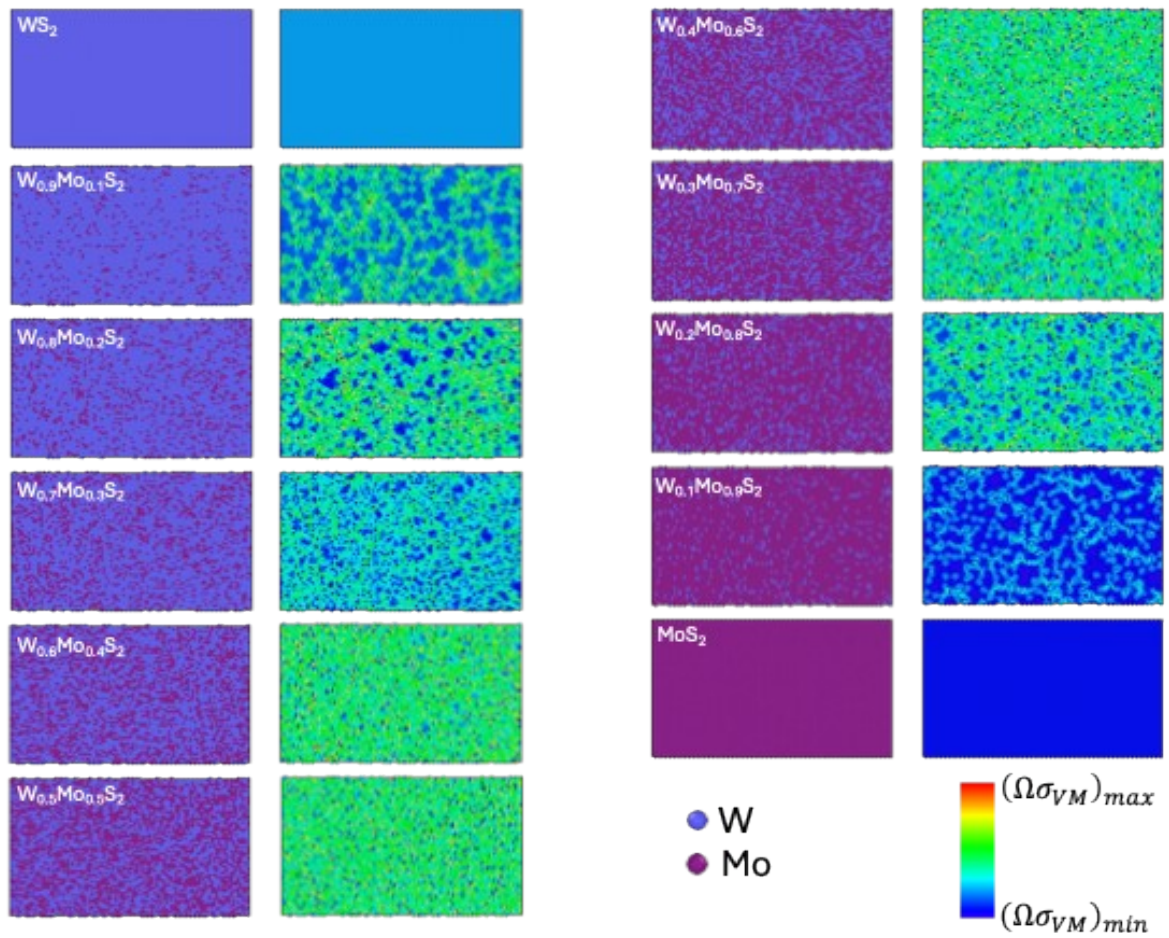

Fig. S6. Atomistic simulation results: the stress distribution of different alloys in atomistic simulations. Left column – The atomic distribution of the central metallic (W/Mo) layer. Right column – The atomic local stress times the local atomic volume.

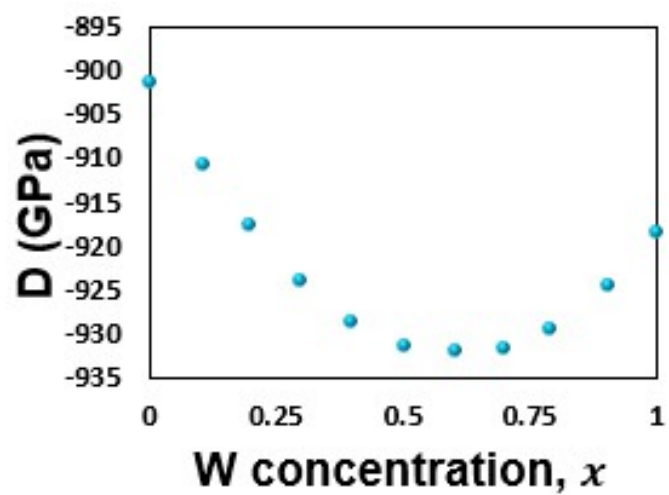

Fig. S7. The third-order elastic modulus as a function of the W concentration obtained from the atomistic simulations.
